# Supplementary material
Source: publisher figshare collection journal article supplement (https://frontiersin.figshare.com/ndownloader/files/22530515)
Supplement: Supplementary file [file 22530515]

Supplemental Table S1.

|          | Day 1 | Day 3 | Day 9 | Day 14 |
|----------|-------|-------|-------|--------|
| Polyp 1  | 1927  | 3018  | 232   | 98     |
| Polyp 2  | 2543  | 3020  | 405   | 35     |
| Polyp 3  | 3118  | 4395  | 314   | 78     |
| Polyp 4  | 13297 | 12985 | 3543  | 224    |
| Polyp 5  | 6940  | 2976  | 44    | 13     |
| Polyp 6  | 3712  | 4185  | 63    | 35     |
| Polyp 7  | 1557  | 1652  | 487   | 467    |
| Polyp 8  | 1854  | 1877  | 481   | 24     |
| Polyp 9  | 1689  | 1725  | 434   | 40     |
| Polyp 10 | 1694  | 1378  | 197   | 69     |

Supplemental Table S2.

|          | Day 1 | Day 3 | Day 9 | Day 14 |
|----------|-------|-------|-------|--------|
| Polyp 1  | 8603  | 6646  | 2246  | 639    |
| Polyp 2  | 8748  | 3947  | 176   | 8      |
| Polyp 3  | 12060 | 8710  | 571   | 13     |
| Polyp 4  | 2900  | 3182  | 1974  | 428    |
| Polyp 5  | 3211  | 4009  | 1494  | 1071   |
| Polyp 6  | 4017  | 2991  | 156   | 21     |
| Polyp 7  | 4836  | 1762  | 52    | 35     |
| Polyp 8  | 12987 | 10023 | 415   | 37     |
| Polyp 9  | 6919  | 4326  | 177   | 8      |
| Polyp 10 | 2428  | 2809  | 202   | 10     |

Supplemental Table S3.

|          | Day 1 | Day 3 | Day 9 | Day 14 |
|----------|-------|-------|-------|--------|
| Polyp 1  | 6482  | 720   | 52    | 6      |
| Polyp 2  | 8193  | 5240  | 1161  | 591    |
| Polyp 3  | 9625  | 7075  | 5509  | 3540   |
| Polyp 4  | 10722 | 9761  | 491   | 19     |
| Polyp 5  | 5292  | 556   | 204   | 198    |
| Polyp 6  | 6095  | 147   | 18    | 4      |
| Polyp 7  | 5733  | 3863  | 714   | 150    |
| Polyp 8  | 3834  | 67    | 5     | 0      |
| Polyp 9  | 3229  | 2657  | 661   | 178    |
| Polyp 10 | 10477 | 5806  | 713   | 0      |

Supplemental Table S4.

|          | Day 1 | Day 3 | Day 9 | Day 14 |
|----------|-------|-------|-------|--------|
| Polyp 1  | 4897  | 4084  | 4009  | 874    |
| Polyp 2  | 3048  | 870   | 133   | 53     |
| Polyp 3  | 6179  | 5255  | 625   | 86     |
| Polyp 4  | 5494  | 6741  | 412   | 41     |
| Polyp 5  | 8195  | 8098  | 2088  | 1548   |
| Polyp 6  | 9700  | 9654  | 460   | 21     |
| Polyp 7  | 3810  | 1758  | 16    | 16     |
| Polyp 8  | 1050  | 758   | 346   | 120    |
| Polyp 9  | 1255  | 1099  | 533   | 109    |
| Polyp 10 | 1075  | 967   | 256   | 36     |

Supplemental Table S5.

|          | Day 1 | Day 3 | Day 9 | Day 14 |
|----------|-------|-------|-------|--------|
| Polyp 1  | 2036  | 2500  | 2313  | 756    |
| Polyp 2  | 1962  | 2200  | 699   | 7      |
| Polyp 3  | 2089  | 3068  | 700   | 157    |
| Polyp 4  | 11966 | 8079  | 6281  | 5867   |
| Polyp 5  | 15946 | 5454  | 285   | 4      |
| Polyp 6  | 1844  | 1794  | 25    | 3      |
| Polyp 7  | 20121 | 17493 | 4217  | 4065   |
| Polyp 8  | 2629  | 2577  | 1571  | 1059   |
| Polyp 9  | 1992  | 1417  | 135   | 45     |
| Polyp 10 | 2750  | 2298  | 1080  | 480    |

**Supplemental Table S1.** Algal cell population size in polyps inoculated with strain *Stri* at each time point; kept at 32°C (red= increase)

**Supplemental Table S2.** Algal cell population size in polyps inoculated with strain *Smic* at each time point; kept at 32°C (red= increase)

**Supplemental Table S3.** Algal cell population size in polyps inoculated with strain *Slin* at each time point; kept at 32°C (purple= strobilation)

**Supplemental Table S4.** Algal cell population size in polyps inoculated with strain *Spil* at each time point; kept at 32°C (red= increase, purple= strobilation)

**Supplemental Table S5.** Algal cell population size in wild type polyps at each time point; kept at 32°C (red= increase)

Supplemental Table S6.

|          | Day 1 | Day 3 | Day 9  | Day 14 |
|----------|-------|-------|--------|--------|
| Polyp 1  | 2143  | 2141  | 148    | 8      |
| Polyp 2  | 7673  | 7669  | 1074   | 43     |
| Polyp 3  | 25247 | 20208 | 867    | 79     |
| Polyp 4  | 16883 | 12234 | 3997   | 96     |
| Polyp 5  | 8081  | 4116  | (Dead) | (Dead) |
| Polyp 6  | 3752  | 1365  | 223    | 6      |
| Polyp 7  | 3783  | 2691  | 65     | 1      |
| Polyp 8  | 2435  | 1547  | 548    | 28     |
| Polyp 9  | 2179  | 1749  | 605    | 19     |
| Polyp 10 | 2509  | 2041  | 484    | 63     |

Supplemental Table S8.

|          | Day 1 | Day 3 | Day 9 | Day 14 |
|----------|-------|-------|-------|--------|
| Polyp 1  | 8520  | 201   | 26    | 1      |
| Polyp 2  | 3075  | 1305  | 111   | 65     |
| Polyp 3  | 4284  | 149   | 49    | 2      |
| Polyp 4  | 8639  | 2908  | 176   | 15     |
| Polyp 5  | 7326  | 1901  | 13    | 5      |
| Polyp 6  | 4072  | 847   | 51    | 2      |
| Polyp 7  | 6857  | 573   | 43    | 1      |
| Polyp 8  | 3337  | 881   | 118   | 0      |
| Polyp 9  | 6903  | 3830  | 306   | (Dead) |
| Polyp 10 | 8685  | 2626  | 268   | 0      |

Supplemental Table S10.

|          | Day 1 | Day 3  | Day 9  | Day 14 |
|----------|-------|--------|--------|--------|
| Polyp 1  | 2070  | 1343   | 126    | 5      |
| Polyp 2  | 1953  | 1583   | 261    | 182    |
| Polyp 3  | 19295 | (Dead) | (Dead) | (Dead) |
| Polyp 4  | 10569 | 6756   | 37     | 0      |
| Polyp 5  | 2078  | 1132   | 460    | 75     |
| Polyp 6  | 10055 | 4787   | 54     | 0      |
| Polyp 7  | 1925  | 1051   | 549    | 107    |
| Polyp 8  | 1573  | 1236   | 242    | 14     |
| Polyp 9  | 15569 | 4228   | 38     | 5      |
| Polyp 10 | 1275  | 1331   | 101    | 0      |

Supplemental Table S7.

|          | Day 1 | Day 3 | Day 9 | Day 14 |
|----------|-------|-------|-------|--------|
| Polyp 1  | 7752  | 2638  | 576   | 52     |
| Polyp 2  | 2588  | 762   | 386   | 37     |
| Polyp 3  | 6991  | 3633  | 573   | 118    |
| Polyp 4  | 7235  | 3661  | 529   | 88     |
| Polyp 5  | 9154  | 8894  | 2680  | 161    |
| Polyp 6  | 4388  | 3535  | 320   | 246    |
| Polyp 7  | 7436  | 3527  | 430   | 10     |
| Polyp 8  | 11992 | 4388  | 509   | 48     |
| Polyp 9  | 5477  | 1531  | 101   | 4      |
| Polyp 10 | 1415  | 1348  | 149   | 3      |

Supplemental Table S9.

|          | Day 1 | Day 3 | Day 9 | Day 14 |
|----------|-------|-------|-------|--------|
| Polyp 1  | 17966 | 4084  | 1560  | 456    |
| Polyp 2  | 8423  | 870   | 741   | 323    |
| Polyp 3  | 8022  | 5255  | 1972  | 169    |
| Polyp 4  | 6902  | 6732  | 88    | 90     |
| Polyp 5  | 7851  | 4737  | 540   | 13     |
| Polyp 6  | 6700  | 3609  | 1090  | 34     |
| Polyp 7  | 2448  | 2180  | 239   | 96     |
| Polyp 8  | 4619  | 2233  | 253   | 8      |
| Polyp 9  | 1262  | 1223  | 25    | 8      |
| Polyp 10 | 6344  | 5564  | 1190  | 56     |

**Supplemental Table S6.** Algal cell population size in polyps inoculated with strain *Stri* at each time point; kept at 34°C

**Supplemental Table S7.** Algal cell population size in polyps inoculated with strain *Smic* at each time point; kept at 34°C

**Supplemental Table S8.** Algal cell population size in polyps inoculated with strain *Slin* at each time point; kept at 34°C

**Supplemental Table S9.** Algal cell population size in polyps inoculated with strain *Spil* at each time point; kept at 34°C

**Supplemental Table S10.** Algal cell population size in wild type polyps at each time point; kept at 34°C (red=increase)

## Supplemental Table 11.

Least square means comparison (LSMEAN) between groups

| Groups being compared   | Estimate at 32°C | Pr(> t ) at 32°C | Estimate at 34°C | Pr(> t ) at 34°C |
|-------------------------|------------------|------------------|------------------|------------------|
| <i>Stri- Slin</i>       | 0.118612         | 0.7997           | 0.98028          | <b>0.0161</b>    |
| <i>Stri – Smic</i>      | -0.268122        | 0.5669           | -0.30227         | 0.4462           |
| <i>Stri -Spil</i>       | -0.176986        | 0.7052           | -0.43890         | 0.2701           |
| <i>Stri - Wild type</i> | -0.565850        | 0.2294           | 0.86194          | <b>0.0332</b>    |
| <i>Slin – Smic</i>      | -0.386734        | 0.4096           | -1.28255         | <b>0.0020</b>    |
| <i>Slin - Spil</i>      | -0.295598        | 0.5280           | -1.41918         | <b>0.0007</b>    |
| <i>Slin - Wild type</i> | -0.684463        | 0.1474           | -0.11835         | 0.7649           |
| <i>Smic - Spil</i>      | 0.091136         | 0.8454           | -0.13664         | 0.7299           |
| <i>Smic - Wild type</i> | -0.297728        | 0.5250           | 1.16420          | <b>0.0047</b>    |
| <i>Spil - Wild type</i> | -0.388864        | 0.4071           | 1.30084          | <b>0.0018</b>    |

Estimate refers to how strains are performing at temperature in comparison to one another. A negative value indicates that the second strain listed is outperforming the first strain.  $P < 0.05$  indicates a statistically significant difference between groups.
